# Supplementary material for: A Monovalent Mt10-CVB3 Vaccine Prevents CVB4-Accelerated Type 1 Diabetes in NOD Mice
Source: MDPI journal article supplement (doi:10.3390/vaccines11010076), 2022-12-29
Supplement: s1 [file s1]

**Table S1:** Comparison of sequences between different CVB serotypes.

| Sequences  | GenBank accession numbers                                         | Percentage similarity matrices* |       |       |       |       |       |
|------------|-------------------------------------------------------------------|---------------------------------|-------|-------|-------|-------|-------|
|            |                                                                   | CVB1                            | CVB2  | CVB3  | CVB4  | CVB5  | CVB6  |
| Nucleotide | Coxsackievirus B1  gb M16560.1 CXA1G:1-7389                       |                                 | 78.34 | 80.46 | 77.06 | 79.19 | 78.30 |
|            | Coxsackievirus B2 strain Ohio-1 gb AF085363.1 :1-7411             | 78.34                           |       | 79.37 | 77.34 | 78.90 | 78.02 |
|            | Coxsackievirus B3 strain Nancy  gb JX312064.1 :1-7399             | 80.46                           | 79.37 |       | 76.74 | 79.54 | 77.68 |
|            | Coxsackievirus B4 strain E2  gb AF311939.1 :1-7397                | 77.06                           | 77.34 | 76.74 |       | 76.27 | 77.05 |
|            | Coxsackievirus B5 strain Faulkner gb AF114383.1 :1-7400           | 79.19                           | 78.90 | 79.54 | 76.27 |       | 77.53 |
|            | Coxsackievirus B6 strain Schmitt gb AF105342.1 :1-7398            | 78.30                           | 78.02 | 77.68 | 77.05 | 77.53 |       |
| Amino acid | Coxsackievirus B1 gb AAC00531.1 :1-2182                           |                                 | 89.27 | 89.53 | 88.47 | 91.23 | 90.69 |
|            | Coxsackievirus B2 strain Ohio-1 gb AAD46138.1 AF081485_1:1-2187   | 89.27                           |       | 87.23 | 88.63 | 88.69 | 88.96 |
|            | Coxsackievirus B3 Nancy gb AAA74400.1 :1-2185                     | 89.53                           | 87.23 |       | 86.52 | 89.50 | 88.59 |
|            | Coxsackievirus B4 strain E2  gb Q86887.3 POLG_CXB4E_1:1-2183      | 88.47                           | 88.63 | 86.52 |       | 88.48 | 88.90 |
|            | Coxsackievirus B5 strain Faulkner gb AAF21971.1 AF114383_1:1-2185 | 91.23                           | 88.69 | 89.50 | 88.48 |       | 91.31 |
|            | Coxsackievirus B6 strain Schmitt gb AAF12719.1 AF105342_1:1-2184  | 90.69                           | 88.96 | 88.59 | 88.90 | 91.31 |       |

\* Percentage sequence similarity between serotypes was calculated using the MUSCLE alignment algorithm
